# Supplementary material
Source: publisher figshare collection journal article supplement (https://gsajournals.figshare.com/ndownloader/files/16251965)
Supplement: Supplementary file 1 [file 16251965]

**Table S2. Primers used to edit *ZCF29.*** The guide is highlighted in grey, and the mutations introduced in red.

| Name | Sequence 5’-3’ | Application |
| --- | --- | --- |
| gCoZCF29_TOP | CCACTATGCGTGGCGAGTGACAA | Cloning of the guide into the pCP-tRNA plasmid |
| gCoZCF29_BOT | AACTTGTCACTCGCCACGCATAG |
| rCoZCF29_TOP | CTCGGTTATCACAAAGGTACTACTATGCGTGGCGAGTGACAAAAGCGTAAAATTT | Synthesis of the repair template |
| rCoZCF29_BOT | TTTCGAAGAATTTGTCGCTCAACAGTTGCTTAAGGAAATTTTACGCTTTTGTCAC |
| sCoZFC29_FWD | ACCGATATGATTGCTAGCCC | Sequencing of the edited site |
| pCoZFC29_REV | GTATCGACCTGATCATTTGG |
